# Supplementary material for: Prospective incidence epidemiology study protocol: conducting active surveillance to assess the burden of Lyme disease (BOLD) in primary care practices in endemic areas of six European countries
Source: PubMed Central journal article supplement — BMJ Open. 2023 Dec 9;13(12):e070903. doi: 10.1136/bmjopen-2022-070903 (PMC10729257; doi:10.1136/bmjopen-2022-070903), 2023-12-09
Supplement: bmjopen-2022-070903supp002.pdf [file bmjopen-2022-070903supp002.pdf]

*Supplemental Table - Lyme Disease and related diagnoses with relevant International Classification of Diseases (ICD; procedure codes used in medical billing) codes if available.*

| <b>Condition</b>                                  | <b>ICD9 Code</b> | <b>ICD10 Code</b> |
|---------------------------------------------------|------------------|-------------------|
| Lyme disease                                      | 088.81           | A69.2             |
| Lyme borreliosis                                  | NA               | NA                |
| Erythema migrans                                  | NA               | NA                |
| Acrodermatitis atrophicans chronica               | 701.8            | L90.4             |
| Lyme arthritis                                    | NA               | A69.23, M01.2     |
| Lyme neuroborreliosis                             | NA               | A69.22            |
| Borreliolymphocytoma                              | NA               | NA                |
| Lyme carditis                                     | NA               | NA                |
| Lyme-related intraocular inflammation             | NA               | NA                |
| Bell's Palsy                                      | 351.0            | G51.0             |
| Various neuritis, neuropathy, and nerve disorders | 351.8-357.89     | G51.8-G61.89      |

*NA = not available*

*a. Records are searched using diagnoses/key words from the Table above as well as any diagnoses/terms that are used for LD locally.*
