# Supplementary figures and images for: Prospective incidence epidemiology study protocol: conducting active surveillance to assess the burden of Lyme disease (BOLD) in primary care practices in endemic areas of six European countries
Source: PubMed Central journal article supplement — BMJ Open. 2023 Dec 9;13(12):e070903. doi: 10.1136/bmjopen-2022-070903 (PMC10729257; doi:10.1136/bmjopen-2022-070903), 2023-12-09

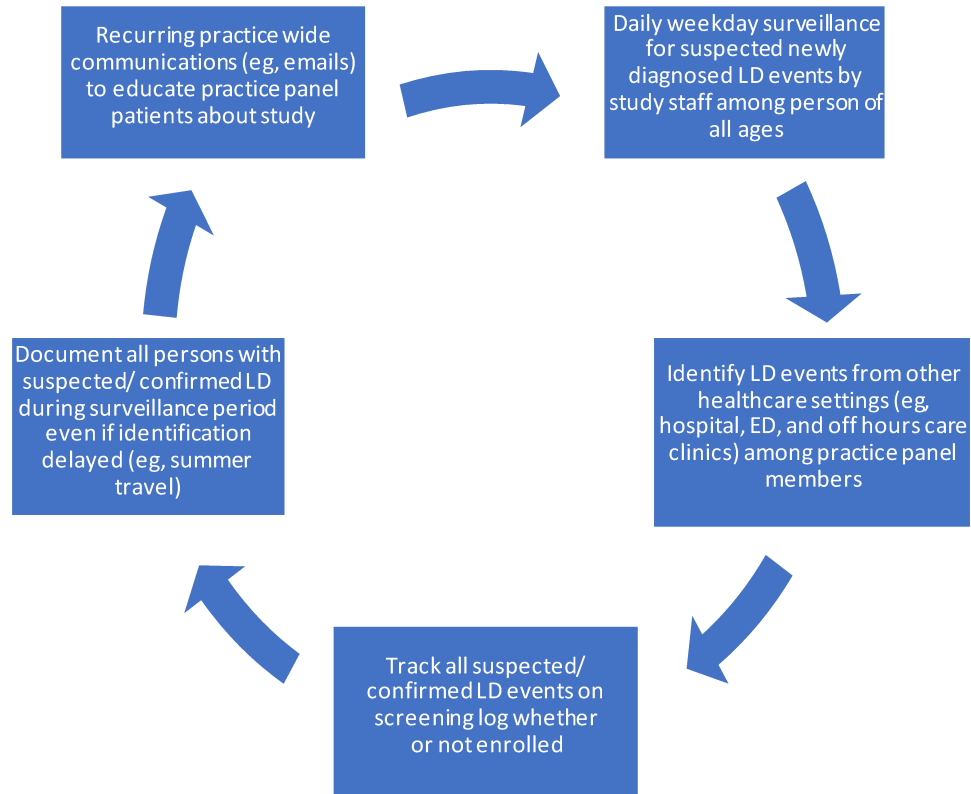

Supplemental Figure – Active Surveillance Process within GP practice panels

Supplement: bmjopen-2022-070903supp001.pdf [file bmjopen-2022-070903supp001.pdf]
